# Supplementary material for: Determinants of Long‐Term Outcomes and Costs in the Management of Critical Limb Ischemia: A Population‐Based Cohort Study
Source: PubMed Central journal article supplement — J Am Heart Assoc. 2018 Aug 15;7(16):e009724. doi: 10.1161/JAHA.118.009724 (PMC6201392; doi:10.1161/jaha.118.009724), 2018-08-15
Supplement: JAH3-7-e009724-s001.pdf [file JAH3-7-e009724-s001.pdf]

# **SUPPLEMENTAL MATERIAL**

**Table S1. Coding scheme to identify interventional procedures in Medicare eligible patients diagnosed with critical limb ischemia in 2011.**

| <b>Therapy Code</b>                     | <b>Description</b>                                               |
|-----------------------------------------|------------------------------------------------------------------|
| <b>Endovascular Revascularization *</b> |                                                                  |
| <i>ICD-9-CM Code</i>                    |                                                                  |
| 00.55                                   | Insertion of drug eluting peripheral vessel stent                |
| 00.60                                   | Insertion of drug-eluting stent(s) of superficial femoral artery |
| 39.50                                   | Angioplasty or atherectomy of non-coronary vessel                |
| 39.90                                   | Insertion of non-drug-eluting, non-coronary artery stent         |
| <i>CPT Code</i>                         |                                                                  |
| 37220                                   | Iliac revasc                                                     |
| 37221                                   | Iliac revasc w/stent                                             |
| 37222                                   | Iliac revasc add-on                                              |
| 37223                                   | Iliac revasc w/stent add-on                                      |
| 37224                                   | Fem/popl revas w/tla                                             |
| 37225                                   | Fem/popl revas w/ather                                           |
| 37226                                   | Fem/popl revasc w/stent                                          |
| 37227                                   | Fem/popl revasc stnt & ather                                     |
| 37228                                   | Tib/per revasc w/tla                                             |
| 37229                                   | Tib/per revasc w/ather                                           |
| 37230                                   | Tib/per revasc w/stent                                           |
| 37231                                   | Tib/per revasc stent & ather                                     |
| 37232                                   | Tib/per revasc add-on                                            |
| 37233                                   | Tibper revasc w/ather add-on                                     |
| 37234                                   | Revasc opn/prq tib/pero stent                                    |
| 37235                                   | Tib/per revasc stnt & ather                                      |
| 37236                                   | Open/perq place stent 1st                                        |
| 37237                                   | Open/perq place stent ea add                                     |
| 37238                                   | Open/perq place stent same                                       |
| 37239                                   | Open/perq place stent ea add                                     |
| <b>Surgical Revascularization *</b>     |                                                                  |
| <i>ICD-9-CM Code</i>                    |                                                                  |
| 38.08                                   | Incision of lower limb arteries                                  |
| 38.16                                   | Endarterectomy of abdominal arteries                             |
| 38.18                                   | Endarterectomy of lower limb arteries                            |
| 38.38                                   | Resection of vessel with anastomosis                             |
| 38.40                                   | Resection of vessel with replacement, unspecified site           |
| 38.48                                   | Resection of vessel with replacement, lower limb arteries        |
| 38.49                                   | Resection of vessel with replacement, lower limb veins           |
| 38.68                                   | Other excision of vessel                                         |
| 38.88                                   | Other surgical occlusion of vessels                              |
| 39.25                                   | Aorta-iliac-femoral bypass                                       |
| 39.29                                   | Other (peripheral) vascular shunt or bypass                      |

|                 |                                      |
|-----------------|--------------------------------------|
| 39.49           | Other revision of vascular procedure |
| <i>CPT Code</i> |                                      |
| 35302           | Rechanneling of artery               |
| 35303           | Rechanneling of artery               |
| 35304           | Rechanneling of artery               |
| 35305           | Rechanneling of artery               |
| 35306           | Rechanneling of artery               |
| 35331           | Rechanneling of artery               |
| 35351           | Rechanneling of artery               |
| 35355           | Rechanneling of artery               |
| 35361           | Rechanneling of artery               |
| 35363           | Rechanneling of artery               |
| 35371           | Rechanneling of artery               |
| 35372           | Rechanneling of artery               |
| 35452           | Repair arterial blockage             |
| 35472           | Repair arterial blockage             |
| 35500           | Harvest vein for bypass              |
| 35521           | Art byp grft axill-femoral           |
| 35533           | Art byp grft axill/fem/fem           |
| 35556           | Art byp grft fem-popliteal           |
| 35558           | Art byp grft fem-femoral             |
| 35563           | Art byp grft ilioiliac               |
| 35565           | Art byp grft iliofemoral             |
| 35566           | Art byp fem-ant-post tib/prl         |
| 35571           | Art byp pop-tibl-prl-other           |
| 35583           | Vein byp grft fem-popliteal          |
| 35585           | Vein byp fem-tibial peroneal         |
| 35587           | Vein byp pop-tibl peroneal           |
| 35621           | Art byp axillary-femoral             |
| 35623           | Art byp axillary-pop-tibial          |
| 35654           | Art byp axill-fem-femoral            |
| 35656           | Art byp femoral-popliteal            |
| 35661           | Art byp femoral-femoral              |
| 35663           | Art byp ilioiliac                    |
| 35665           | Art byp iliofemoral                  |
| 35666           | Art byp fem-ant-post tib/prl         |
| 35671           | Art byp pop-tibl-prl-other           |
| 35681           | Composite byp grft pros&vein         |
| 35682           | Composite byp grft 2 veins           |
| 35683           | Composite byp grft 3/> segmt         |
| 35686           | Bypass graft/av fist patency         |
| 35700           | Reoperation bypass graft             |
| 35875           | Removal of clot in graft             |
| 35876           | Removal of clot in graft             |
| 35879           | Revise graft w/vein                  |

|                                   |                                                          |
|-----------------------------------|----------------------------------------------------------|
| 35881                             | Revise graft w/vein                                      |
| 35883                             | Revise graft w/nonauto graft                             |
| 35884                             | Revise graft w/vein                                      |
| 35903                             | Excision graft extremity                                 |
| <b>Amputation above the ankle</b> |                                                          |
| <i>ICD-9-CM Code</i>              |                                                          |
| 84.10                             | Lower limb amputation (NOS)                              |
| 84.16                             | Disarticulation of knee                                  |
| 84.17                             | Amputation above knee                                    |
| 84.18                             | Disarticulation of hip                                   |
| 84.19                             | Abdominopelvic amputation                                |
| <i>CPT Code</i>                   |                                                          |
| 27290                             | Amputation of leg at hip                                 |
| 27295                             | Amputation of leg at hip                                 |
| 27590                             | Amputate leg at thigh                                    |
| 27591                             | Amputate leg at thigh                                    |
| 27592                             | Amputate leg at thigh                                    |
| 27594                             | Amputation follow-up surgery                             |
| 27596                             | Amputation follow-up surgery                             |
| 27598                             | Amputate lower leg at knee                               |
| 27880                             | Amputation of lower leg                                  |
| 27881                             | Amputation of lower leg                                  |
| 27882                             | Amputation of lower leg                                  |
| 27884                             | Amputation follow-up surgery                             |
| 27886                             | Amputation follow-up surgery                             |
| <b>Amputation below the ankle</b> |                                                          |
| <i>ICD-9-CM Code</i>              |                                                          |
| 84.11                             | Amputation of toe                                        |
| 84.12                             | Amputation through foot                                  |
| 84.13                             | Disarticulation of ankle                                 |
| 84.14                             | Amputation of ankle through malleoli of tibia and fibula |
| 84.15                             | Other amputation below knee                              |
| <i>CPT Code</i>                   |                                                          |
| 27888                             | Amputation of foot at ankle                              |
| 27889                             | Amputation of foot at ankle                              |
| 28130                             | Removal of ankle bone                                    |
| 28140                             | Removal of metatarsal                                    |
| 28800                             | Amputation of midfoot                                    |
| 28805                             | Amputation thru metatarsal                               |
| 28810                             | Amputation toe & metatarsal                              |
| 28820                             | Amputation of toe                                        |
| 28825                             | Partial amputation of toe                                |
| 28124                             | Partial removal of toe                                   |
| 28126                             | Partial removal of toe                                   |
| 28150                             | Removal of toe                                           |

|       |                        |
|-------|------------------------|
| 28153 | Partial removal of toe |
| 28160 | Partial removal of toe |

CPT indicates Current Procedural Terminology; ICD-9-CM, International Classification of Diseases, Ninth Revision, Clinical Modification.

\*CPT codes 35221, 35226, 35256, and 35286 (repair blood vessel lesion with or without patch angioplasty) were included in revascularization analyses, but was not included in endovascular or surgical revascularization analyses due to uncertainty in definition.

**Table S2. Baseline characteristics of Medicare eligible patients diagnosed with critical limb ischemia in 2011 categorized by first major therapy in propensity-matched sample.**

| Characteristic               | Unmatched Sample |             |                  |         | Matched Sample |           |                  |         |
|------------------------------|------------------|-------------|------------------|---------|----------------|-----------|------------------|---------|
|                              | Endovascular     | Surgical    | Major Amputation | P-value | Endovascular   | Surgical  | Major Amputation | P-value |
| No. of patients              | 28 530           | 14 283      | 3982             |         | 3314           | 3314      | 3314             |         |
| <i>Geography</i>             |                  |             |                  |         |                |           |                  |         |
| Region                       |                  |             |                  | <0.001  |                |           |                  | 0.17    |
| South                        | 12 250 (44)      | 5713 (41)   | 2057 (53)        |         | 1666 (50)      | 1650 (50) | 1660 (50)        |         |
| Midwest                      | 7177 (26)        | 3390 (24)   | 703 (18)         |         | 644 (19)       | 704 (21)  | 660 (20)         |         |
| Northeast                    | 4756 (17)        | 3037 (22)   | 653 (17)         |         | 638 (19)       | 576 (17)  | 624 (19)         |         |
| West                         | 3795 (14)        | 1916 (14)   | 365 (9)          |         | 338 (10)       | 352 (11)  | 353 (11)         |         |
| Puerto Rico                  | 93 (<1)          | 39 (<1)     | 90 (2)           |         | 28 (<1)        | 32 (<1)   | 17 (<1)          |         |
| Population density           |                  |             |                  | <0.001  |                |           |                  | <0.01   |
| Urban                        | 25 339 (90)      | 12 715 (90) | 3345 (86)        |         | 2994 (90)      | 2928 (88) | 2921 (88)        |         |
| Rural                        | 2732 (10)        | 1380 (10)   | 523 (14)         |         | 320 (10)       | 386 (12)  | 393 (12)         |         |
| <i>Demographics</i>          |                  |             |                  |         |                |           |                  |         |
| Male sex                     | 14 773 (52)      | 8281 (58)   | 2107 (53)        | <0.001  | 1875 (57)      | 1891 (57) | 1852 (56)        | 0.62    |
| Age, yr                      | 74±11            | 72±11       | 76±12            | <0.001  | 74±11          | 74±10     | 74±12            | 0.95    |
| Race                         |                  |             |                  | <0.001  |                |           |                  | 0.21    |
| White                        | 21 374 (75)      | 11 290 (79) | 2426 (61)        |         | 2253 (68)      | 2210 (67) | 2220 (67)        |         |
| Black                        | 5346 (19)        | 2352 (17)   | 1340 (34)        |         | 921 (28)       | 923 (28)  | 927 (28)         |         |
| Other/unknown                | 1723 (6)         | 599 (4)     | 209 (5)          |         | 140 (4)        | 181 (5)   | 167 (5)          |         |
| <i>Medical history</i>       |                  |             |                  |         |                |           |                  |         |
| Hypertension                 | 21 205 (74)      | 10 333 (72) | 2937 (74)        | <0.001  | 2451 (74)      | 2421 (73) | 2421 (73)        | 0.63    |
| Diabetes                     | 16 776 (59)      | 6798 (48)   | 2268 (57)        | <0.001  | 1870 (56)      | 1870 (56) | 1889 (57)        | 0.86    |
| Coronary artery disease      | 14 440 (51)      | 7027 (49)   | 1854 (47)        | <0.001  | 1535 (46)      | 1593 (48) | 1597 (48)        | 0.23    |
| Chronic kidney disease       | 10 162 (36)      | 3853 (27)   | 1507 (38)        | <0.001  | 1179 (36)      | 1158 (35) | 1212 (37)        | 0.38    |
| Hyperlipidemia               | 7775 (27)        | 4059 (28)   | 808 (20)         | <0.001  | 682 (21)       | 747 (23)  | 723 (22)         | 0.15    |
| Smoking                      | 5754 (20)        | 4180 (29)   | 777 (20)         | <0.001  | 642 (19)       | 700 (21)  | 721 (22)         | <0.05   |
| <i>Clinical presentation</i> |                  |             |                  |         |                |           |                  |         |
| Rest pain                    | 8365 (29)        | 5977 (42)   | 276 (7)          | <0.001  | 279 (8)        | 288 (9)   | 267 (8)          | 0.93    |
| Ulcer                        | 13 625 (48)      | 4786 (34)   | 906 (23)         |         | 846 (26)       | 841 (25)  | 851 (26)         |         |
| Gangrene                     | 6540 (23)        | 3520 (25)   | 2800 (70)        |         | 2189 (66)      | 2185 (66) | 2196 (66)        |         |

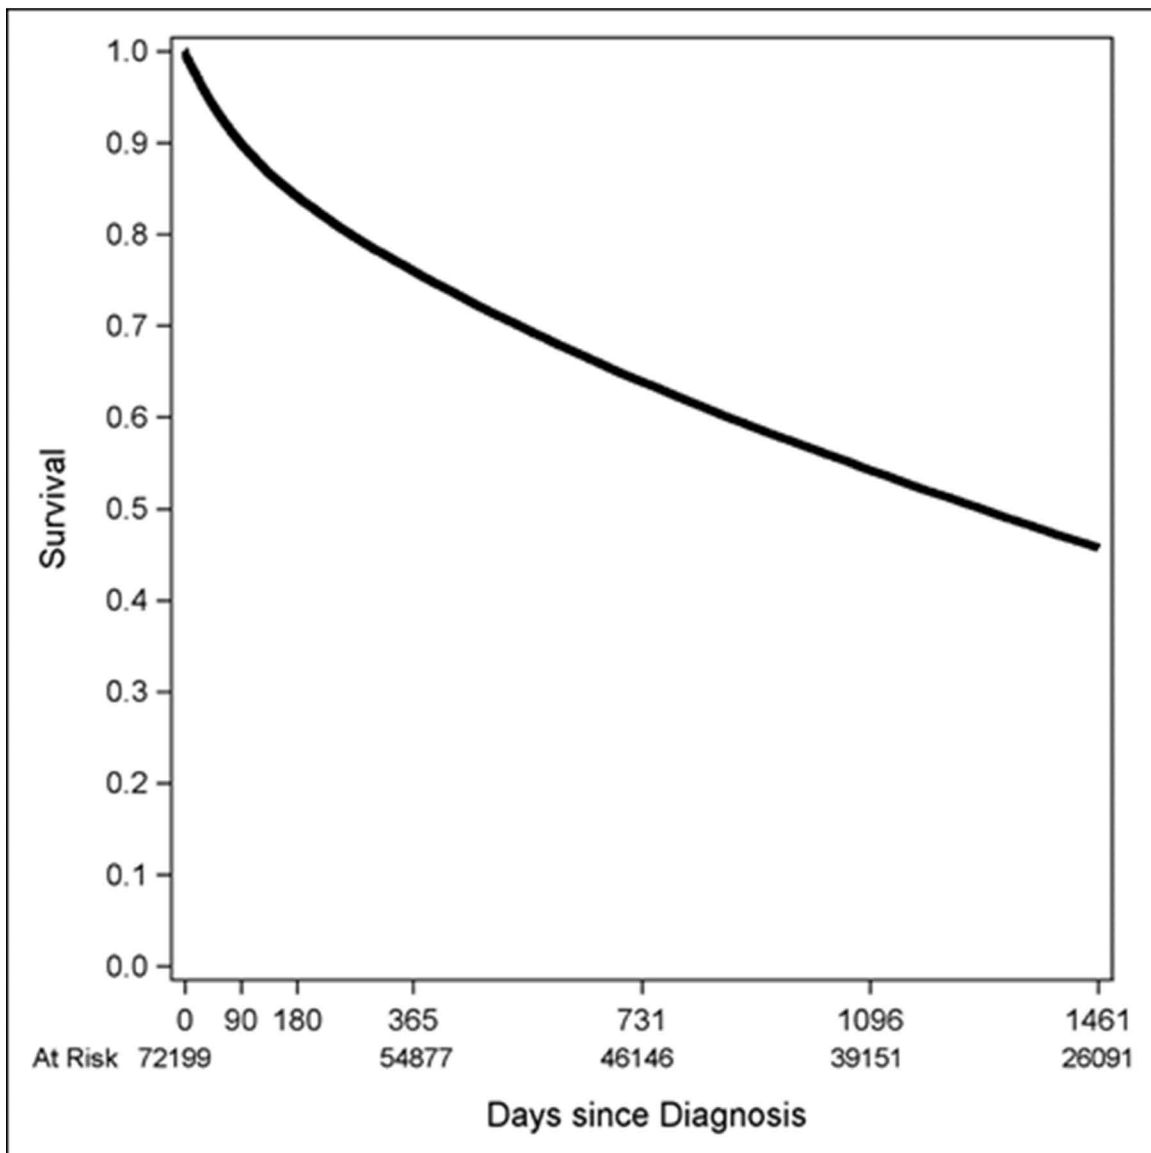

| Days Since Diagnosis | Survival (95% CI)  | Cumulative Number of Deaths | Number of Patients Remaining at Risk |
|----------------------|--------------------|-----------------------------|--------------------------------------|
| 0                    | 99.7% (99.6, 99.7) | 251                         | 72199                                |
| 30                   | 95.7% (95.6, 95.9) | 3088                        | 69201                                |
| 90                   | 89.9% (89.6, 90.1) | 7322                        | 64925                                |
| 180                  | 84.1% (83.8, 84.3) | 11511                       | 60736                                |
| 365                  | 76.0% (75.6, 76.3) | 17357                       | 54877                                |
| 731                  | 63.9% (63.5, 64.2) | 26077                       | 46146                                |
| 1096                 | 54.2% (53.8, 54.6) | 33062                       | 39151                                |
| 1461                 | 45.7% (45.4, 46.1) | 39024                       | 26091                                |

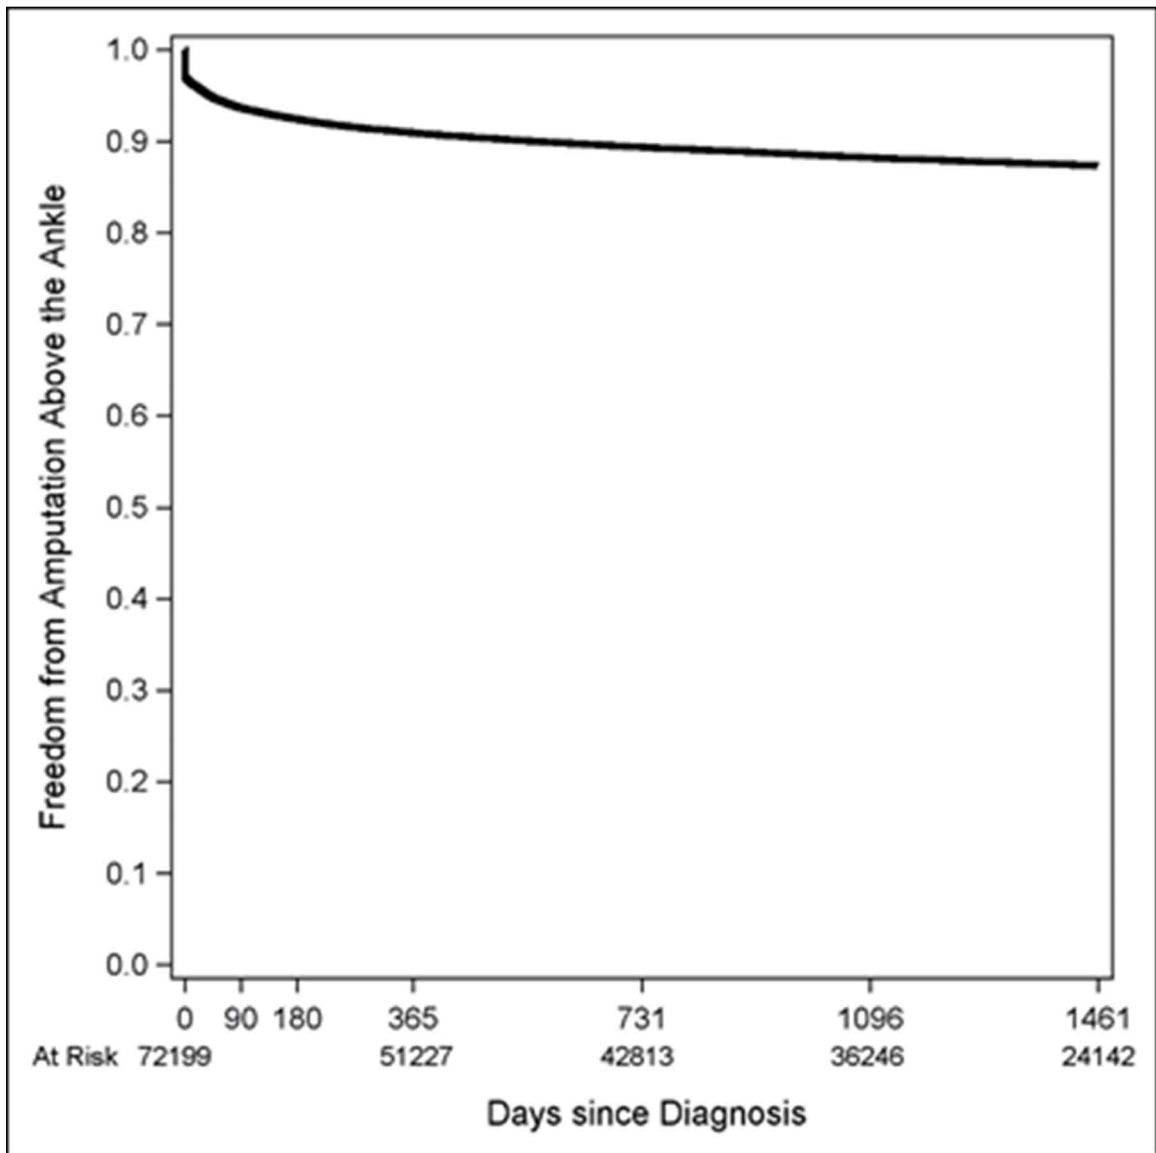

| Days Since Diagnosis | Freedom from Amputation (95% CI) | Cumulative Number of Patients with Amputations | Number of Patients Remaining at Risk |
|----------------------|----------------------------------|------------------------------------------------|--------------------------------------|
| 0                    | 97.0% (96.8, 97.1)               | 2185                                           | 72199                                |
| 30                   | 95.4% (95.2, 95.5)               | 3317                                           | 66277                                |
| 90                   | 93.7% (93.5, 93.8)               | 4479                                           | 61458                                |
| 180                  | 92.4% (92.2, 92.6)               | 5256                                           | 57128                                |
| 365                  | 90.9% (90.7, 91.2)               | 6139                                           | 51227                                |
| 731                  | 89.4% (89.1, 89.6)               | 6958                                           | 42813                                |
| 1096                 | 88.2% (88.0, 88.5)               | 7471                                           | 36246                                |
| 1461                 | 87.3% (87.1, 87.6)               | 7795                                           | 24142                                |



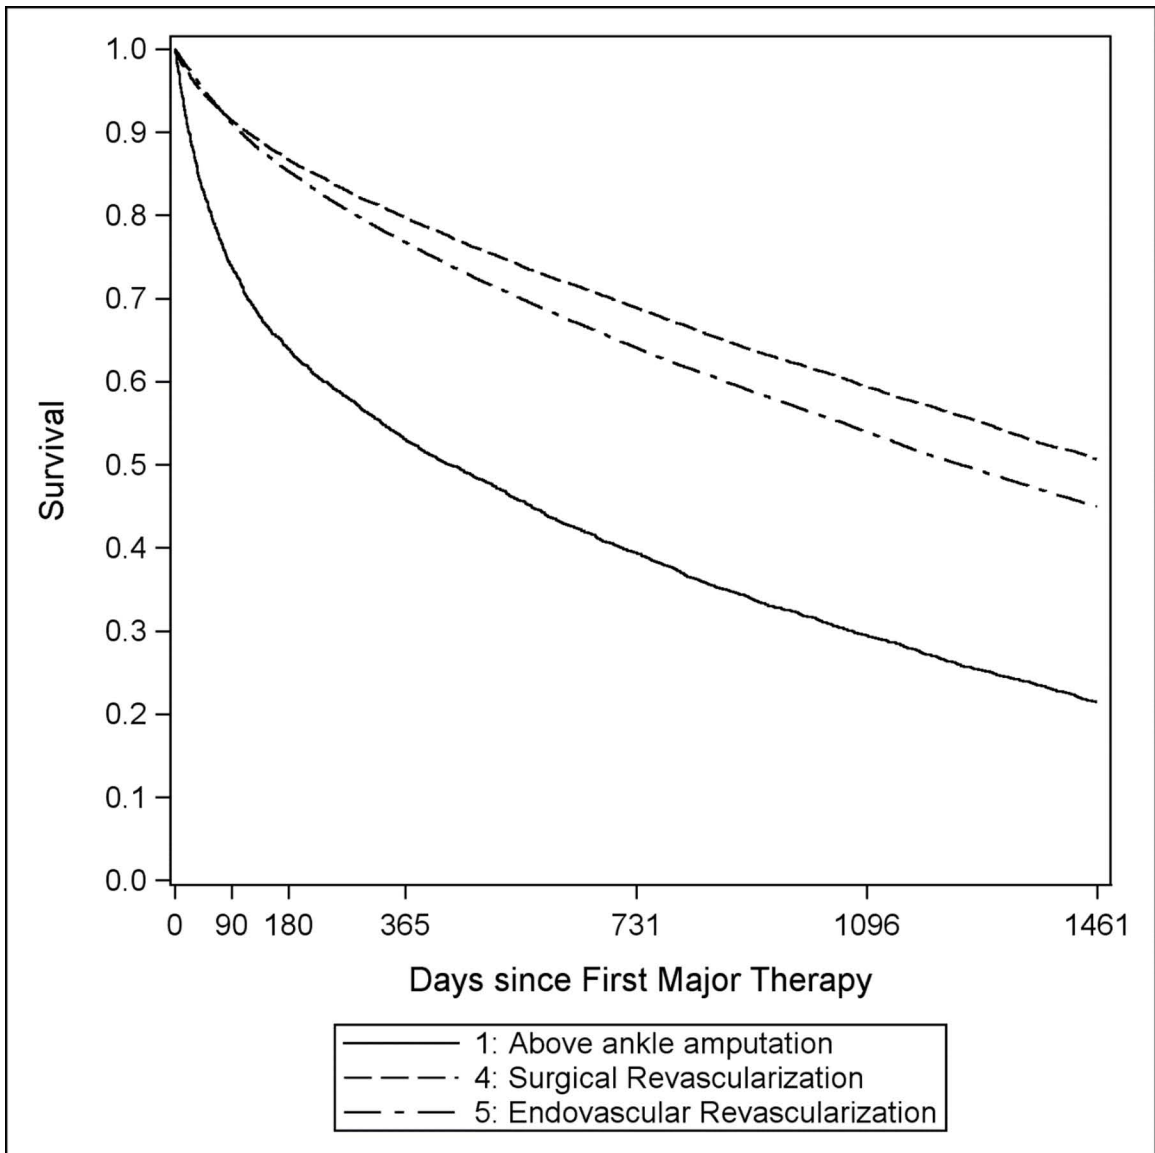

| Days Since Treatment | Endovascular | Surgical | Major Amputation |
|----------------------|--------------|----------|------------------|
| 30                   | 96.7%        | 96.0%    | 87.4%            |
| 90                   | 91.1%        | 91.4%    | 73.7%            |
| 180                  | 85.3%        | 86.7%    | 63.9%            |
| 365                  | 76.8%        | 79.7%    | 53.0%            |
| 731                  | 64.1%        | 68.9%    | 39.4%            |
| 1096                 | 53.9%        | 59.4%    | 29.5%            |
| 1461                 | 45.0%        | 50.6%    | 21.4%            |

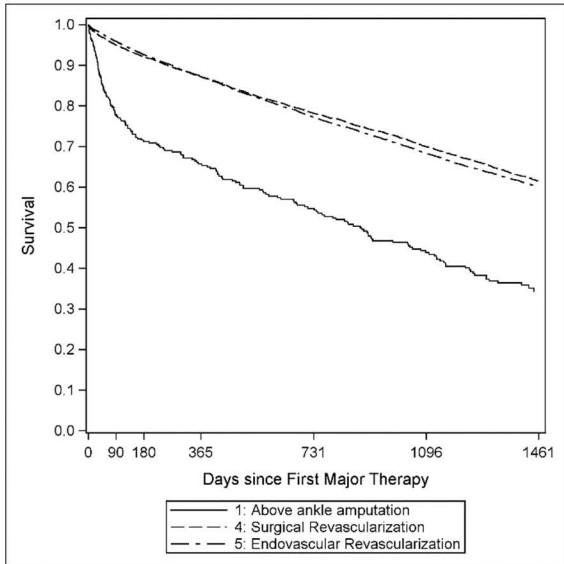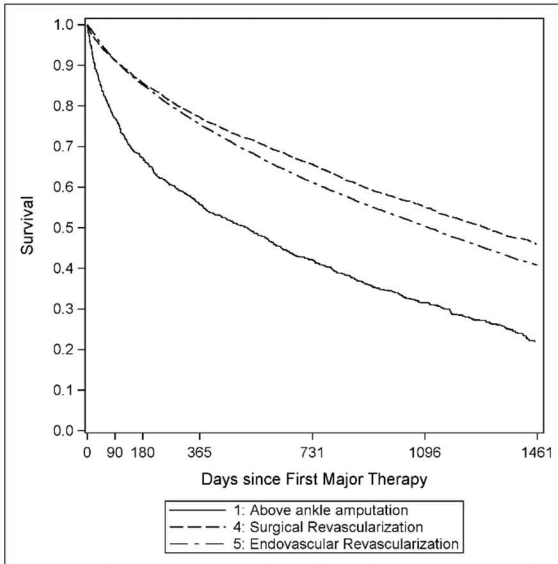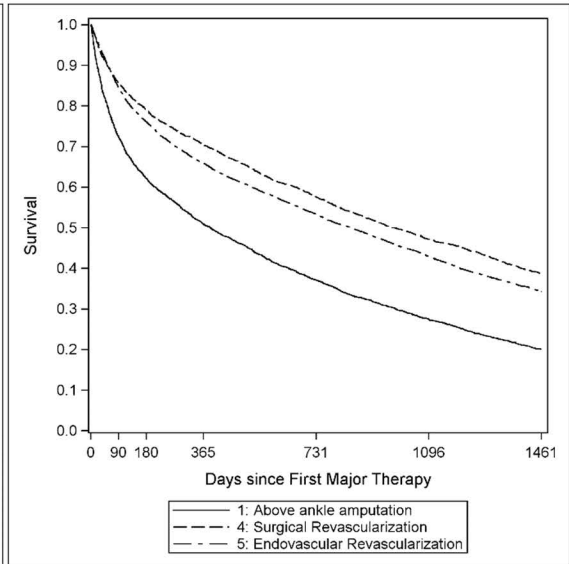

| Days Since Treatment | Rest Pain |       |       | Ulcer |       |       | Gangrene |       |       |
|----------------------|-----------|-------|-------|-------|-------|-------|----------|-------|-------|
|                      | Endo      | Surg  | Amp   | Endo  | Surg  | Amp   | Endo     | Surg  | Amp   |
| 30                   | 98.4%     | 97.7% | 90.2% | 96.9% | 96.0% | 88.5% | 94.2%    | 93.4% | 86.7% |
| 90                   | 95.9%     | 95.0% | 77.8% | 91.3% | 91.1% | 76.9% | 84.6%    | 85.6% | 72.3% |
| 180                  | 92.6%     | 92.0% | 71.2% | 85.2% | 85.7% | 67.2% | 76.1%    | 79.0% | 62.1% |
| 365                  | 87.3%     | 87.2% | 65.7% | 75.5% | 77.2% | 55.8% | 65.9%    | 70.4% | 50.9% |
| 731                  | 77.2%     | 78.2% | 54.8% | 61.2% | 65.6% | 42.0% | 53.3%    | 57.6% | 37.0% |
| 1096                 | 68.3%     | 70.0% | 43.9% | 50.4% | 55.1% | 31.5% | 42.9%    | 47.2% | 27.5% |
| 1461                 | 60.2%     | 61.4% | 34.2% | 40.8% | 45.9% | 21.7% | 34.2%    | 38.7% | 20.0% |
